# Supplementary material for: Air Pollutants and Daily Hospital Admissions for Psychiatric Care: A Review
Source: Atypon-hosted journal article supplement (doi:10.1176/appi.ps.201800565), 2020-09-29
Supplement: appi.ps.201800565.ds001.pdf [file appi.ps.201800565.ds001.pdf]

Identification

Records identified through  
database screening  
N=127

Screening

Records after duplicates  
removed  
N=100

100 abstracts screened

89 studies excluded  
because not  
relevant

Eligibility

11 abstracts of original  
articles included

Included

19 full-text articles  
included

8 articles identified  
through other sources
